# Supplementary material for: Prognostic significance of diabetes on visit-to-visit ultrafiltration volume variability in chronic hemodialysis patients
Source: Research Square preprint supplement (doi:10.21203/rs.3.rs-8581684/v1), 2026-02-13
Supplement: Supplementary file 1 [file 2e4b3167aaab683cde8fe297.docx]

Supplementary material:

Table S1: Baseline characteristics according to DM status and UVSD (with post-hoc annotations)

| Variable | DM– and UVSD low | DM– and UVSD high | DM+ and UVSD low | DM+ and UVSD high | p (overall) |
| --- | --- | --- | --- | --- | --- |
| Age (year) | 65.8 ± 13.3ᵇ | 58.5 ± 12.6ᵃ | 67.7 ± 9.0ᵇ | 65.6 ± 11.7ᵇ | <0.001 |
| BMI (kg/m²) | 26.3 ± 5.8ᵃ | 28.2 ± 6.5ᵃᵇ | 28.6 ± 3.6ᵇ | 30.0 ± 6.0ᵇ | 0.012 |
| Ultrafiltration parameters | | | | | |
| UVSD (ml) | 445.5 ± 89.8ᵃ | 712.1 ± 130.3ᵇ | 452.7 ± 91.2ᵃ | 701.4 ± 138.5ᵇ | <0.001 |
| UVCV | 0.22 ± 0.10ᵃ | 0.32 ± 0.09ᵇ | 0.23 ± 0.09ᵃ | 0.31 ± 0.10ᵇ | <0.001 |
| UF volume (ml) | 2331.6 ± 826.7 | 2381.2 ± 580.7 | 2364.8 ± 705.1 | 2512.9 ± 684.3 | NS |
| Echocardiographic parameters | | | | | |
| LVEF (%) | 57.0 ± 7.8ᵃ | 56.2 ± 9.7ᵃ | 54.1 ± 10.4ᵃᵇ | 52.8 ± 11.6ᵇ | 0.028 |
| LVMI (g/m²) | 137.6 ± 37.4ᵃ | 147.8 ± 40.7ᵃᵇ | 149.2 ± 33.6ᵇ | 159.3 ± 36.8ᵇ | 0.041 |
| LVEDD (mm) | 51.0 ± 6.0ᵃ | 51.5 ± 5.6ᵃ | 52.9 ± 4.6ᵇ | 53.8 ± 4.3ᵇ | 0.033 |
| LVESD (mm) | 33.1 ± 6.2ᵃ | 33.7 ± 6.5ᵃ | 35.4 ± 6.1ᵇ | 36.7 ± 6.6ᵇ | 0.014 |
| E/A | 0.87 ± 0.35ᵃ | 0.90 ± 0.43ᵃ | 0.76 ± 0.26ᵇ | 0.71 ± 0.22ᵇ | 0.019 |
| Laboratory results | | | | | |
| Albumin (g/L) | 38.7 ± 3.1ᵃ | 39.1 ± 4.0ᵃ | 38.8 ± 2.7ᵃᵇ | 38.0 ± 3.9ᵇ | 0.008 |
| Phosphate (mmol/L) | 1.68 ± 1.03ᵃ | 1.89 ± 0.59ᵇ | 1.71 ± 0.61ᵃ | 1.55 ± 0.39ᵃ | <0.001 |
| PTH (pg/mL) | 44.3 ± 32.5ᵃ | 67.2 ± 67.6ᵇ | 51.3 ± 27.9ᵃᵇ | 67.4 ± 95.8ᵇ | 0.031 |
| CRP (mg/L) | 7.6 ± 10.3ᵃ | 11.2 ± 19.4ᵇ | 9.7 ± 13.5ᵃᵇ | 11.4 ± 11.0ᵇ | 0.022 |

*Values sharing the same superscript letter (ᵃ, ᵇ) are not significantly different from each other (Tukey HSD post-hoc test). Different letters indicate statistically significant differences between groups (p <0.05).*

*DM: diabetes mellitus; UVSD:ultrafiltration volume standard deviation; UVCV:ultrafiltration volume coefficient of variation, UF: ultrafiltration; LVEF:left ventricular ejection fraction; LVMI: left ventricular mass index, LVEDD: left ventricular end-diastolic diameter, LVESD: left ventricular end-systolic doameter; E/A: early and late mitral inflow; PTH: parathormone; CRP: C-reactive protein.*

Table S2: Baseline characteristics according to DM status and UVCV (with post-hoc annotations)

| Variable | DM– and UVCV low | DM– and UVCV high | DM+ and UVCV low | DM+ and UVCV high | p (overall) |
| --- | --- | --- | --- | --- | --- |
| Age (year) | 63.1 ± 13.4ᵃ | 61.2 ± 13.4ᵃ | 64.7 ± 11.2ᵃᵇ | 69.0 ± 8.8ᵇ | 0.021 |
| BMI (kg/m²) | 28.0 ± 6.1ᵃ | 26.6 ± 6.2ᵃ | 27.4 ± 4.5ᵃ | 31.7 ± 4.4ᵇ | 0.009 |
| Ultrafiltration parameters | | | | | |
| UVCV | 0.22 ± 0.10ᵃ | 0.32 ± 0.09ᵇ | 0.23 ± 0.09ᵃ | 0.31 ± 0.10ᵇ | <0.001 |
| UVSD (ml) | 510.3 ± 151.7ᵃ | 633.8 ± 177.4ᵇ | 528.6 ± 162.9ᵃ | 659.4 ± 169.8ᵇ | <0.001 |
| UF volume (ml) | 2331.6 ± 826.7 | 2381.2 ± 580.7 | 2364.8 ± 705.1 | 2512.9 ± 684.3 | NS |
| Echocardiographic parameters | | | | | |
| LVEF (%) | 57.3 ± 7.5ᵃ | 56.1 ± 9.4ᵃ | 54.8 ± 10.1ᵃᵇ | 52.3 ± 11.3ᵇ | 0.031 |
| LVMI (g/m²) | 138.2 ± 38.6ᵃ | 146.9 ± 40.1ᵃᵇ | 147.1 ± 34.9ᵃᵇ | 158.6 ± 36.2ᵇ | 0.039 |
| LVEDD (mm) | 50.9 ± 5.8ᵃ | 51.6 ± 5.9ᵃ | 52.8 ± 4.7ᵇ | 54.1 ± 4.2ᵇ | 0.028 |
| LVESD (mm) | 33.0 ± 6.2ᵃ | 33.8 ± 6.5ᵃ | 35.1 ± 6.0ᵇ | 36.9 ± 6.7ᵇ | 0.017 |
| E/A | 0.88 ± 0.36ᵃ | 0.89 ± 0.42ᵃ | 0.77 ± 0.25ᵇ | 0.70 ± 0.23ᵇ | 0.022 |
| Laboratory results | | | | | |
| Albumin (g/L) | 39.3 ± 2.8ᵃ | 38.8 ± 4.2ᵃᵇ | 39.3 ± 2.5ᵃ | 37.5 ± 3.8ᵇ | 0.011 |
| Phosphate (mmol/L) | 1.68 ± 0.86ᵃ | 1.64 ± 0.66ᵃ | 1.71 ± 0.61ᵃ | 1.55 ± 0.39ᵇ | 0.018 |
| PTH (pg/mL) | 52.6 ± 47.9ᵃ | 48.1 ± 37.2ᵃ | 51.3 ± 27.9ᵃᵇ | 67.4 ± 95.8ᵇ | 0.034 |
| CRP (mg/L) | 10.7 ± 21.4ᵃ | 7.7 ± 9.8ᵃ | 9.3 ± 12.8ᵃᵇ | 11.3 ± 11.6ᵇ | 0.029 |

*Values sharing the same superscript letter are not significantly different from each other (Tukey HSD post-hoc test). Different letters indicate statistically significant differences (p < 0.05).*

*DM: diabetes mellitus; UVSD:ultrafiltration volume standard deviation; UVCV:ultrafiltration volume coefficient of variation, UF: ultrafiltration; LVEF:left ventricular ejection fraction; LVMI: left ventricular mass index, LVEDD: left ventricular end-diastolic diameter, LVESD: left ventricular end-systolic doameter; E/A: early and late mitral inflow; PTH: parathormone; CRP: C-reactive protein.*
